# Supplementary material for: A Rapid One-Generation Genetic Screen in a Drosophila Model to Capture Rhabdomyosarcoma Effectors and Therapeutic Targets
Source: PubMed Central journal article supplement (PMC4321029; doi:10.1534/g3.114.015818), 2014-12-09
Supplement: supp_g3.114.015818_015818SI.pdf [file supp_g3.114.015818_015818SI.pdf]

**A Rapid One-Generation Genetic Screen in a *Drosophila* Model to Capture Rhabdomyosarcoma Effectors and Therapeutic Targets**

Kathleen A. Galindo<sup>1</sup>, Tiana R. Endicott<sup>1</sup>, Usha Avirneni-Vadlamudi<sup>1</sup>, and Rene L. Galindo<sup>1,2,3</sup>

<sup>1</sup>Departments of Pathology, <sup>2</sup>Molecular Biology, and Pediatrics<sup>3</sup>, University of Texas Southwestern Medical Center at Dallas, 5323 Harry Hines Boulevard, Dallas, Texas 75390-9072, USA.

Correspondence: Rene L. Galindo, M.D., Ph.D.

Department of Pathology

University of Texas Southwestern Medical Center at Dallas

Dallas, TX. 75390-9072

Phone: 214.648.4116, Fax: 214.648.4070

E-mail: [rene.galindo@utsouthwestern.edu](mailto:rene.galindo@utsouthwestern.edu)

**DOI: 10.1534/g3.114.015818**

## File S1

### **Deficiency Enhancers, Candidate Genes List:**

#### **Df(2L)BSC32, Breakpoints: 32A1-2;32C5-D1**

*Trim9, CG6138, w-cup, CG34160, CG34161, CG7329, CG31872, CG18284, CG17097, CG17098, CG45690, CG31871, CG17104, CG17105, CG17107, CG7299, CG7296, CG7294, CG17108, CG7300, Lip1, Lip2, CG6415, CG6431, CG17118, CG6750, Dpy-30L1, Nup107, Vha16-5, CG12299, CG6729, mir-4970, CG17124, CG6495, Ubc2, CG6724, CG17127, CG31869, CG31870, Nos, CG6508, CG17134, CG6700, mir-4987, CG17140, CG17139, Porin2, porin, CG43129, Dnz1, aurB, Stam, CG12517, CG14071, CG14070, CG7309, CG14069, dpr2, CG14072, CG33129, YL-1, CG16743, abo, ATPsynG, SCAR, piwi, CG12253, CG16833, aub, lectin-33A, RpL9, Nup154, Art8, dUTPase, Samuel, Acp32CD, CG14913, CG18666*

#### **Df(2L)TW161, Breakpoints: 38A6-B1;40A4-B1**

*sick, CG10481, TotF, Victoria, COX4, CG34051, CG42866, CG13965, CG16772, CG10680, OS9, Hf, CG43861, CG10659, sNPF, barr, lok, vls, bwa, CG10730, pr, neb, fok, CG10747, CG10721, Taf13, nesd, mRpS18B, Kua, CG13970, CG10651, CG17571, CG17570, CG12617, spir, La, RtGEF, Ugt37a1, CG16798, CG10947, CG10949, Arpc2, CG15130, CG31688, CG31683, CG31687, CG18858, Cdc23, CG2493, CG43233, mir-1, CG34007, CG44270, mir-4973, CG31677, CG15475, mir-133, mir-288, CG17472, CG31680, Sfp38D, CG17470, phr6-4, CG2608, Uhg3, CG18810, CG2611, bru, CG2614, CG31678, ik2, Cen, CG2617, Hr38, CG9316, CG9317, CG9318, Fs(2)Ket, CG9319, Ns4, CG9323, dia, cad, Pomp, vari, CG9328, CG33322, CheB38b, CheB38a, CheB38c, CG9331, CG31673, CG31674, Oseg5, Spn38F, CG31676, CG14402, twit, CG14400, CG9336, CG9338, CG31675, CG14401, CG43739, sky, Mtp, RPA2, CG9272, CG9270, CG42238, Itgbetanu, CG9265, tadr, CG33511, CG33510, CG33509, ppk13, CG9259, CG14397, CG12050, CG34136, CG9257, Nhe2, Dap160, CG9253, del, E2f2, Mpp6, CG9249, CG9248, Nbr, CG9246, CG43345, CG43346, Acon, CG31627, bur, Mcm10, Ret, CG31624, CG31988, clumsy, Atg18b, CG8679, CG8677, CG31626, Hr39, l(2)k14505, CG8671, mir-4974, Cyp6t2Psi, Mio, Gr39a, crc, dimm, Tsp39D, dtr, Gr39b, CG8665, nrv3, Lamp1, nompB, CG2201, Df31, Ac3, Cul2, CG2225, EF2, CG31619, step, CG1416, CG31612, CG11630, tsh*

#### **Df(2R)BSC40, Breakpoints: 48E1-2;48E2-10**

*CG8888, CG13186, jeb, CG18343, SkpB, CG8378, OSCP1, Hen1, CG8878, CG8407, Prp8, mir-988, CG13177, CG34232, Oda, SmD3, mir-281-2, mir-281-1, Cct5, EndoG, CG8860, wash, CG13175, CG33964, SmF, Cyp6g1, Cyp6g2, Cyp6t3, CG8858, RpS11, Sr-CII, CG13171, CG8854*

#### **Df(2R)vg-C, Breakpoints: 49B2;49E2**

*fra, CG33752, CG30056, CG33775, Cyp301a1, Ak6, stil, CIC-b, Sin3A, Amph, Galphaq, CG45086, CG30054, CG17760, muskelin, CG33792, spt4, CG33672, CG33671, Iswi, CG8785, CG8778, ZnT49B, CG8646, nemy, CG42708, CG8771, CG13148, CG30053, Obp49a, CG8768, wuc, CG42663, mos, Taz, mRpL18, ox, Dgkepsilon, Nacalpha, CG12374, sca, CG17580, Cyp9h1, Or49b, CG17575, antr, CG30486, CG17574, bic, CG3790, CG3814, Aats-asp, Nmda1, vg, NAT1, CG13319, sug, CG17019, CG13322, Sans, CG30487, Mdr49*

**Df(2R)BSC161, Breakpoints: 54B2;54B17**

*mbl, Sip1, CG6568, CG30101, Prosalpha5, cnk, l(2)k01209, CG6550, Mtap, Bap55, Lhr, EDTP, CG18467, mthl4, mthl3, CG10764, robls54B, robl, CG14478, Tes, qkr54B, insb, CG43110, veil, NT5E-2, CG30103*

**Df(2R)k10408, Breakpoints: 54B16; 54B16**

*mthl3, CG10764, robls54B, robl, CG14478, Tes, qkr54B, insb, CG43110, veil*

**Df(2R)ED4065, Breakpoints: 60C8;60E8**

*slik, Rpn8, SerT, CG45068, CG45069, prom, CG42383, CG15873, Pgam5-2, CG3483, CG4563, CG13579, CG3492, CG3494, CG16837, CG13589, CG13590, Crtp, Yu, Ssl, Prosalpha4T2, CG13581, Letm1, Ir60b, Ir60c, Ir60d, Ir60f, CG4612, Brca2, Ir60e, CG13585, CG4622, CG11413, ITP, Nurf-38, CG11414, uri, Fcp1, CG3511, Start1, SIFa, CG4681, pio, CG13587, ATPsynF, CG3548, CG3565, CG3570, CG4707, CG42360, CG42361, CG4741, CG3608, CG13594, Cyp9c1, CG3640, CG4781, CG3663, Cpr60D, CG30161, ND-19, CG34214, CG4806, CG33228, Pof, Mmp1, ST6Gal, Mid1, Usp15-31, spz6, CG3880, CG12848, CG3894, GstE12, Eps-15, egg, Lcp9, Eap, Aats-tyr-m, CG3589, key, Reg-5, ETH, Orc4, CG12849, CG3611, CG42851, Dll, CG3650, Atf-2, CG16896, CG30423, CG44247, NKAIN, Ance-5, NaCP60E, Tpc2, CG9083, RpL41, pain, CG30427, CG3760, CG2811, Tina-1, CG15861, CG3770, CG2790, CG12851*

**Df(2R)M60E, Breakpoints: 60E6;60E11**

*Tina-1, CG15861, CG3770, CG2790, CG12851, CG2765, CG30424, RpL19, CG3776, Phk-3, CG2736, emp, CG3829, zip*

**Df(3L)emc-E12, Breakpoints: 61A;61D3**

*mthl8, CG43149, Lsp1gamma, CG13405, CG12483, Pdk1, CG6845, Dic61B, p130CAS, CG7049, Vdup1, CG13875, Mkp, CG34140, Mtch, rno, mri, Gyk, NitFhit, CG13876, CG7028, thoc7, CG16940, Kaz1-ORFB, Kaz1-ORFA, pyx, CG13877, CG33229, CG42846, CG34454, CG34453, E(bx), mthl14, DIP2, wac, Tudor-SN, mRpL17, CG34263, miple, miple2, CG32845, ttm2, RhoGEF3, fwd, CG34264, CG32344, Atac3, Ptpmeg, mthl9, mthl10, mth, CG1231, Cdc5, Roc1b, CG1233, CG13884, trh, CG13891, klar, CG34267, CG34268, CG34269, CG17180, Cypl, hipk, Ppm1, Kah, MED14, CG13893, Reg-2, CG43337, ban, Gale, CG3402, MED30, Rev1, CG17129, CG3386, ebd1, CG3344, CG32483, RabX6, Vti1, CG13894, CG13895, CkIIalpha-i3, CG13896, hng3, emc, CG13898, CG13900, CG42553, CG42554, CG13901, CG13887, CG13902, Gr61a, CG13889, CG13890, dpr20, CG12502, Usp10, CG13907*

**Df(3L)GN24, Breakpoints: 63F6-7;64C13-15**

*Sc2, ida, mge, Eip63F-1*

**Df(3L)ZN47, Breakpoints: 64C;65C**

*Dhc64C, Aats-leu, CG13708, CG13707, CG32237, CG32235, CG17150*

**Df(3L)W10, Breakpoints: 75A6-7;75C1-2**

*CG7408, CG5506, CG16775, CG7402, Tsp74F, Prestin, CG14353, CG5290, Eip75B, CG32192, CG42393, CG44006, CG44005, CG44004, CG34253, CG13698, mRpS26, CG5147, mus304, CG7341, CG32195, CG42853, Cyp312a1, gk, CG7330, CG13699, hid, CG7320, CheA75a*

**Df(3L) fz2, Breakpoints: 75F10-11;76A1-5**

*fz2*, CG33647, *mRpL21*, *rept*, *nes*, *Bet1*, *Max*, CG9666, CG42374, CG45081, CG9629, CG14085, CG14088, CG14086, CG14089, *Gbs-76A*, *fal*, *pip*

**Df(3R) ea, Breakpoints: 88E7-13;89A1**

*eIF-2gamma*, *Su(var)3-9*, *Set*, *ATPsynO*, CG14864, *Zip88E*, *Cp190*, CG4338, *MRG15*, *l(3)neo43*, *Tm1*, CG45218, *Tm2*, CG14866, CG6276, CG44040, *ear*, CG6236, *ea*, *mRpL9*, *FK506-bp1*, *Sra-1*, CG6218, *Aats-ser*, *Surf4*, CG31301, CG42726, CG42727, *Trs33*, CG5038, *Atg4b*, CG5044, *ldlCp*, *Trax*, CG6171, CG34404, CG14868, CG6136, *Ccm3*, *Rbp*, *h-cup*, CG6125, *Atx2*, *mir-13b-1*, *mir-13a*, *mir-2c*, CG6118, *Act88F*, *AdamTS-A*, CG14870, *Rh6*, *Trissin*, CG5205, CG5213, CG44014, CG44013, CG31296, *AOX1*, *AOX2*, *AOX3*, *AOX4*, CG43335, CG43336, *pxb*

**Df(3R) e-RI, Breakpoints: 93B6-7;93D4**

*Dhc93AB*, CG12278, CG31189, CG31207, CG7079, CG17279, *Mvl*, *Cortactin*, *AnxB9*, *r-l*, *dmrt93B*, *HHEX*, *RhoGAP93B*, CG7044, CG5745, *Sec15*, *rtet*, *Rab11*, *ppan*, *Bdbt*, *slmb*, CG5793, *Obp93a*, *Ice2*, CG7009, *Usp8*, *meigo*, *SNF4Agamma*, CG10824, CG5810, *Snmp1*, CG5862, CG3353, *Oga*, CG3337, *Nelf-A*, *e*, CG5892, *ETHR*, *Rab1*, *AP-2sigma*, CG5919, CG3308, CG3301, *SIFaR*, CG17298, *Hsromega*

**Df(3R) 23D1, Breakpoints: 94A3-4;94D1-4**

*SKIP*, *Gld2*, *mir-1010*, CG7084, CG34377, CG7080, CG33721, CG13862, CG5391, CG5388, CG5386, *rdhB*, *Sar1*, *PSR*, *Muted*, CG7071, CG5382, CG5380, *PyK*, CG7069, CG18596, CG34149, CG43342, CG43343, CG5379, CG7059, CG13857, CG13856, CG13855, CG13850, *lqfR*, *Nop56*, *mats*, *pinta*, CG13847, CG12499, CG34288, CG34376, *Rpn7*, *AP-2mu*, CG7054, *Pebp1*, CG5377, *Nrx-1*, *mir-4952*, CG7048, CG5376, *T-cp1*, CG7045, CG7046, *Octbeta1R*, CG5346, CG33099, CG33093, CG5326, *AdipoR*, *bond*, CG5278, CG33110, *CSN6*, *Dph5*, CG33107, CG6937, *btn*, *Efa6*, CG31156, CG13843, *EF-G2*, CG31161, *mRpL45*, *loco*, *wake*, *Gclm*, CG17625, *wfs1*, *Nup133*, *cd*, *Cyp6d4*, *CCAP*, CG6972, CG13842, CG4907, *wge*, *Irp-1A*, CG4813, CG45049, *Takl2*, *Dcr-1*, CG6985, *vret*, *HPlc*, CG17141, CG31139, *rumi*, CG7029, *Usp12-46*, CG4725, CG4723, CG4721, CG13841, CG43091, CG43092, CG43093, CG43094, CG43095, *mir-4953*, CG7031, CG13840, CG4704, *klg*, CG6660

**Df(3R) crb-F89-4, Breakpoints: 95D7-D11;95F15**

*KrT95D*, *Ime4*, *Miro*, *spas*, *Rox8*, CG5986, *Atg6*, CG5991, CG6000, *Hsp68*, *SMC1*, *4EHP*, *Syx1A*, CG10694, CG18428, CG13605, *Rootletin*, CG13607, CG5463, *Tsc1*, *Sec10*, *Npc2f*, *Kall1*, *Slimp*, *p38c*, *p38a*, CG6178, *Myo95E*, CG6182, *mRpS24*, *Apc2*, CG5510, CG13606, *CHORD*, CG5515, *jni*, CG6204, *twin*, CG17786, *cav*, *Spps*, CG13609, *Spase22-23*, *Acp95EF*, *mask*, CG5706, *jar*, *Orct2*, *Orct*, CG13611, CG6356, CG34290, CG6364, CG5715, *crb*, *Nab2*, *BRWD3*, CG5728, *Dis3*, CG6432, *mir-1015*, *Ms*, CG5746, CG6454, *Golgin84*, CG18528, CG5762, CG33339, CG33340, CG17784, CG13613, CG42811, CG42812, CG33341, CG13614, CG17782, CG17781, CG33342

**Df(3R) D605, Breakpoints: 97E2;98A5**

*Cpr97Ea*, *Cpr97Eb*, CG14258, CG14259, *eater*, CG17189, CG6074, *gb*, CG5815, CG6066, CG5880, CG5882

**Df(3R) crb87-5, Breakpoints: 95F7;96A17-18**

*jar*, *Orct2*, *Orct*, CG13611

## **Deficiency Suppressors, Candidate Genes List:**

### ***Df(2L)spd[j2], Breakpoints: 27B2-27F2***

*nrv2, CG17376, CG17377, CG11236, CG17375, sens-2, Rca1, l(2)k09022, Nha1, Nlg2, mir-932, CG13773, Rat1, Wee1, x16, CG32829, nop5, Hrb27C, CG43232, CG18304, Fgop2, ihog, Gas41, SA, CG13775, CG3430, Atac1, CG10399, sip2, Coprox, smt3, uif, CG43321, CG43322, ade3, Pcp, CG31908, CG3476, Rab30, Caper, milt, Mnn1, CG31907, Sem1, Nuf2, CG11289, Pvf2, Pvf3, CG4495, CG4496, CG4497, CG4502, CG13784, ico, Ndae1, CG43799, CG43800, CG13786, Wnt4, CG31909, wg, Wnt6, Wnt10*

### ***Df(2L)TW203, Breakpoints: 36E-36E3;37B10***

*CadN2, CG43271, btv, CG5674, CG5681, Prosbeta5R2, CG5693, CG42659, CG42634, CG42635, CG31740, elfless, rdo, Arr1, ninaD, CG31741, CG15153, CG5755, CG44476, CG15152, CG5758, CG31785, kel, Socs36E, CG17681, CG15155, CG5783, CG7200, CG42750, Ptp36E, CG31802, CG31788, CG31787, CG43362, Sfp36F, CG5790, CG43354, Fas3, Acp36DE, CG34171, RpS26, ncm, bsf, Ntf-2r, let-7-C, mir-100, let-7, mir-125, CG10283, CG10176, kon, CG10178, CG10211, Pde11, CG15160, amos, CG10413, CG31789, CG10333, Atac2, CG15161, MESR3, Cyp310a1, CG43338, CG43339, Mst36Fb, Mst36Fa, CG31751, tos, msl-1, CG10336, CG10383, CG10338, CG10341, CG10376, CG10343, Jwa, Faf, Grip71, Irk3, CG10348, CG42752, CG15167, ham, CG43814, CG10570, CG42502, CG42305, CG17325, CG17324, CG17323, CG17322, CG17597, ScpX, CG10600, CG31752, CG33120, CG17321, CG10602, mRpL13, tup, mir-4946, ssp3, CG10428, Nedd8, CG10621, CG10623, Nak, Tango6, CG10639, CG10431, Swip-1, CG15168, CG15170, CG15169, CG10650, CG31792, CG31793, RpL30, robl37BC, CG15172, Side, hk, CG31800, mib2*

### ***Df(2R)Np5, Breakpoints: 44F12;45DE3***

*babo, CG8216, CG8213*

### ***Df(2R)BSC29, Breakpoints: 45D3-4;45F2-6***

*Non1, l(2)k10201, CG33774, wun, wun2, CG13955, prel, Pdk, ced-6, Camta, CG33758, CG33757, Wnt2, brp, CG1888, mir-14, Or45b, CG1809, Not1, CG1814, CG1868, Updo, CG12929, RpL31, clos, CG1827, Map60, CG1902, CG30338, CG30340, CG30339, GsfT1, GsfT2, CG12926, Mmp2*

### ***Df(2R)BSC3, Breakpoints: 48E12-F4;49A11-B6***

*CG13170, CG43315, CG43316, CG43244, CG13168, Vha36-2, Cam, CG42700, CG8850, SIP2, CG17739, CG30203, CG30046, CG13163, CG8841, garz, CG8490, CG34021, Den1, CG8839, ana3, CG30047, CG30049, CG30043, CG33012, CG13160, CG13159, Cpr49Aa, Cpr49Ab, CG13155, CG8501, Cpr49Ac, Cpr49Ad, Or49a, CG30048, Cpr49Ae, Cpr49Af, Cpr49Ag, CG30050, CG33626, CG33627, Cpr49Ah, CG13157, CG42782, CG8834, CG8520, CG8525, CG13154, Nup54, CG43204, DUBAI, CG30051, Dyb, CG30334, Lac, dgt5, CG8545, CG8550, Dh44-R2, CG34234, fdl, s-cup, vis, achi, CG13151, CG8818, CG8569, CG33632, fra, CG33752, CG30056, CG33775, Cyp301a1, Ak6, stil, CIC-b, Sin3A*

### ***Df(2R)Exel7130, Breakpoints: 50D4;50E4***

*Prosap, CG42287, CG42288, mir-989, Rcd1, pea, CG13018, CG13016, CG8257, O-fut1, Tango7, CG8323, CG18327, CG18324, CG8331, mRpS16, cg, CG30069, VGAT, Sox15, RpS23, mir-308, CG8468, Opa1, mir-1016, CG8485, Usp20-33*

**Df(2R)BSC45, Breakpoints: 54C8-D1;54E2-7**

*Klp54D, CG43324, CG14480, Ns2, POSH, UOCR-6.4, CG42239, Rab4, Dcr-2, CG6484, CG14483, RhoGAP54D, icln, CG30105, Smurf, ND-51L1, CG43920, CG42649, CG10936, CG44403, rhi, Oxp, CCHa1-R, eIF3-S8, CG30108, CG30109, P32, Sema-1b, HPS4, CG42561, CG42562, swi2, rdgBbeta, Uhg1, CG6424, CG10934, CG10933, Snx16, CG4984, CG4975, CG34195, CG6406, CG6401, CG4996, Ir54a, sub, CG10931*

**Df(2R)BSC22, Breakpoints: 56D7-E3;56F9-12**

*Spt5, RpL11, Arl6, EloC, betaTub56D, CG7744, par-1, mei-W68, TBCB, Oseg6, Rep, hpo, CG15120, CG16926, CG11007, Ir56b, Ir56c, Ir56d, sm, CG43111, CG42878, CG16716, CG42753, CG18367, mir-4983, CG43277, CG15124, CG15905, Ir56e, CG15125, mir-6-3, mir-6-2, mir-6-1, mir-5, mir-4, mir-286, mir-3, mir-309, CG11018, hrg, isopeptidase-T-3, CG15127, CG34198, CG15128, CG15126, Obp56a, Obp56b, Obp56c, Obp56d, Obp56e, Obp56f, CG8517, Or56a, Obp56g, Obp56h, Toll-7, CG44569, Obp56i, CG13872, CG42690, CG43195, CG42691, CG30447, CG10822, CG44622, CG44623, CG8654, CG16898, 18w, CG11041, CG16894, CG11044, CG44624, CG44625, CG11099, CG13869, Efhc1.2, CG11208, ppk6, CG9864, Ate1, Hsl, PCNA, plu, RpS18, CG8908, CG10444, CG11788*

**Df(2R)BSC155, Breakpoints: 60B8;60C4**

*yki, CG3209, Mlp60A, CG10339, CG13564, CG16786, snama, gek, enok, CG4049, CG3253, CG3257, CG43776, CG43777, CG43775, tamo, Zfrp8, CG4065, Dat, DnaJ-60, CG42568, spag, CG3328, mRpS17, Nop60B, ocm, cN-IIIB, CG3356, CG11406, CG30419, nord, Ir60a, CG13575, CG3376, CG13577*

**Df(3L)h-i22, Breakpoints: 66D10-11;66E1-2**

*Pex7", h", SrpRbeta", CG32022", CG6511", CG43965", Cp18", Cp15", Cp19", Cp16", Prm", CG13306", Fhos", CG6576", CG5804", CG13310", CG13311", CG34426", CG32023", CG34427", CG13312", CG32024", CG13308", CG13309", dally", CG32026*

**Df(3L)Scf-R6, Breakpoints: 66E1-6;66F1-6**

*dally, CG32026, CG43169, Mcm7, TrpA1, mfr, Tsp66E, CG43783, orb2, GNBP3, mRpL12, CG13313, CG5660, CG5653, CG5021, CG5026, pix, Srp68, CG5644, CG13314, Galk, CG5068, CG5280, smg, CG5087, Doc3, CG5194, Doc2, Doc1, CG5144, Argk, CG4911, CG4942, Tequila, CG32032, CG13315, bol*

**Df(3L)BSC35, Breakpoints: 66F1-1;67B2-3**

*CG13314, Galk, CG5068, CG5280, smg, CG5087, Doc3, CG5194, Doc2, Doc1, CG5144, Argk, CG4911, CG4942, Tequila, CG32032, CG13315, bol, Dhpr, Use1, nwk, mir-4940, Rdl, Slc45-1, CG4476, CG4483, CG4477, GluRIB, PGRP-LA, PGRP-LC, PGRP-LF, UGP, CG32040, CG32039, Pdxk, CG34456, Klp67A, CG4447, CG4452, Fdxh, Hsp67Bc, Hsp67Bb, Hsp22, CG4461, Hsp26, Hsp67Ba, Hsp23, Hsp27, CG4080*

**Df(3L)AC1, Breakpoints: 67A2;67D11-13**

*Slc45-1, CG4476, CG4483, CG4477, GluRIB, PGRP-LA, PGRP-LC, PGRP-LF, UGP, CG32040, CG32039, Pdxk, CG34456, Klp67A, CG4447, CG4452, Fdxh, Hsp67Bc, Hsp67Bb, Hsp22, CG4461, Hsp26, Hsp67Ba, Hsp23, Hsp27, CG4080, eIF-4E, Cpr67B, CG4022, CG3689, CG3967, CG3982, aay, Shc, RpS17, MTF-1, CG42526, Bet3, Nf-YA, CG33926, CG3529, CG3448, ghi, phol, CG3552, CG3437, CG3434, CG44838, Uch-L5, Jarid2, pall, CG32036,*

CG32037, *path*, CG3408, *RpS9*, CG33703, CG33702, CG33700, *Or67a*, *Ir67a*, CG42673, CG46121, CG3222, CG3088, CG3306, *LanB2*, CG3335, *Or67b*, CG8336, *fry*, CG8329, CG18179, CG18180, *CNMaR*, CG16717, *alphaTub67C*, CG6767, CG16719, *Ubc4*, CG6761, CG16711, *SH3PX1*, *vsg*, CG18178, CG14174, *nbs*, *defl*, *Naa60*, *ATPsynB*, CG6749, *mir-4986*, CG42268, CG8177, *Zasp67*, *Ilp1*, CG32052, *Ilp2*, *Ilp3*, *Ilp4*, CG43897, *Ilp5*, *I-2*, *Cdk8*, *RasGAP1*, CG10809, *iPLA2-VIA*, CG8108, CG34382, *Taf2*, *CalpB*, CG6709, CG14164, CG6707, *nudE*, CG34356, CG6685, *Dronc*, CG6674, *vnc*, CG42455, *dpr6*, CG14160, CG32053, CG32054, CG42825, CG42826, *dpr10*, CG8072, CG6628, *ect*, CG8065, CG32055, *scramb1*, *Or67c*, *can*, *Or67d*

**Df(3L)BSC10, Breakpoints: 69D4-5;69F5-7**

*mirr*, *SmD1*, *Ptp69D*, CG32112, CG32109, *Klc*, CG10984, CG10973, CG32113, *Hip1*, CG32106, CG10969, CG17666, *Atg1*, CG42709, *Sap130*, CG32110, CG10754, CG42588, CG10960, CG10948, *Wbp2*, *Ent3*, CG32107, CG10943, CG14120, CG43894, CG14118, CG12520, CG32117, CG32115, CG10752, *Or69a*, CG10748, CG10749, CG11262, CG11263, CG14117, CG11261, *MICAL-like*, CG11267, *mRpL20*, *ste14*, *AdenoK*, *RpS12*, *Zmynd10*, CG17672, *SRm160*, *RpS4*, *Syx13*, CG11279, CG14115, CG34428, CG34429

**Df(3L)BSC20, Breakpoints: 76A7-B1;76B4-5**

CG32206, *ms(3)76Ba*, CG33062, *Chd3*, CG14095, CG14096, CG32214, *825-Oak*, CG12519, CG18294, CG32213, *brv1*, *pncr009:3L*, CG32212, CG9449, CG9451, CG9452

**Df(3L)BSC21, Breakpoints: 79E5-F1;80A2-3**

CG43312, CG43331, CG43330, CG43329, *mir-957*, CG11404, *Trxr-2*, CG14459, *ND-B14.5AL*, CG33766, CG33767, CG33768, CG33769, CG33770, CG33771, CG33772, *mir-958*, CG14457, CG14455, CG14456, CG14454, CG12546, CG14453, CG14452, CG32453, CG45116, CG11370, *ArfGAP3*, CG32452, *mael*, CG14451, CG14450, CG11367, CG32454, CG11241, *l(3)04053*, CG7369, *SPoCk*, CG14448, *jim*

**Df(3R)Tpl10, Breakpoints: 83C1-2;84B1-2**

*plx*, CG2104, *cas*, CG1239, CG2100, CG1236, *Sym*, *Madm*, CG2091, *Sec8*, CG2082, *jagn*, *kat-60L1*, CG2051, *Rpn5*, CG1218, CG2046, CG10979, CG11000, CG42675, *Hpr1*, CG2023, *dgrn*, *glob3*, CG1208, CG1213, CG14676, *disp*, CG34287, *ECSIT*, CG2017, CG34113, CG11373, *Obp83a*, *Obp83b*, *Rm62*, CG10280, CG11459, CG15580, *Or83c*, *Gasp*, *Obp83cd*, *Obp83ef*, *Obp83g*, *Vha14-2*, CG31559, CG1077, *Osi1*, *NPFR*, *Osi24*, *Osi2*, *Osi3*, *Osi4*, *Osi5*, *Osi6*, *Osi7*, *Osi8*, *Osi9*, *Osi10*, *Osi11*, *Osi12*, CG15597, CG15594, *Osi13*, *Osi14*, *Osi15*, *Osi16*, CG46026, CG31560, *Osi17*, *Osi18*, *Osi19*, *Osi20*, CG17917, CG10298, CG17919, *SmD2*, CG18048, *Hr83*, *Pak*, CG42724, CG10286, *CRAT*, CG42564, CG1024, CG42537, *TfIIIFalpha*, *godzilla*, *Dmtn*, *gpp*, CG9727, *Zif*, *Neurochondrin*, CG15186, CG15185, *dpr11*, *Pif2*, CG1137, CG2336, CG1138, CG31482, *glob2*, *sowi*, CG15177, *sunz*, CG31286, CG1315, *Taf1*, CG1307, *twr*, *agt*, *lab*, *Edg84A*, *Ccp84Ag*, *Ccp84Af*, *Ccp84Ae*, *Ccp84Ad*, *Ccp84Ac*, *pncr002:3R*, *Ccp84Ab*, *Ccp84Aa*, *pb*, *zen2*, CG34297, *zen*, *bcd*, *Ama*, *mir-993*, *Dfd*, *mir-10*, *Scr*, *ftz*, *Antp*, *Sodh-1*, CG1979, *dj*, *djl*, CG1988, CG1105, CG1965, CG1104, CG1943, *Ref1*, *Dpck*, CG1091, *alphaTub84B*

**Df(3R)BSC24, Breakpoints: 85B7;85D1**

*pyd*, *osk*, *skap*, CG11964

**Df(3R)Exel6193, Breakpoints: 94D3;94E4**

*klg*, *CG6660*, *Tpl94D*, *CG17244*, *Nha2*, *Or94a*, *Or94b*, *CG34375*, *CG6688*, *lmd*, *CG13833*, *CG13838*, *CG13837*, *CG17121*, *p53*, *Gr94a*, *CG17119*, *sav*, *Ublcp1*, *CG17111*, *CG13830*, *CG17110*, *CG6726*, *CG17109*, *CG6733*, *CG6738*, *Rassf*, *CenB1A*, *CG31365*, *CG31457*, *hh*, *unk*, *VhaAC39-2*, *CG13829*, *Irk1*, *cnc*

***Df(3R)mbc-R1*, Breakpoints: 95A5-7;95D6-11**

*CG31145*, *GILT3*, *GILT2*, *eIF-3p66*, *CG16710*, *CG18754*, *SPE*, *CG10254*, *CG10252*, *prt*, *CG31468*, *CG31148*, *CG31413*, *CG31414*, *CG10301*, *CG10300*, *nau*, *CG10232*, *CG10365*, *Rpn9*, *Hmgcr*, *RanBP3*, *Rpt5*, *Hrd3*, *Plip*, *SdhD*, *CG10217*, *Lsd-1*, *CG10214*, *CG10375*, *tst*, *CG10208*, *Nup98-96*, *mbc*, *CG33111*, *CG34355*, *eIF4G2*, *Pli*, *TfIIA-S*, *tbrd-1*, *sba*, *CG31141*, *Ndc1*, *CG13601*, *CG43998*, *CG43999*, *CG31142*, *Rpt2*, *CG13599*, *RpS19b*, *CG5854*, *Gdh*, *CG12268*, *Aats-glupro*, *AP-1sigma*, *CG31140*, *CG13603*, *CG5902*, *CG13604*, *Rab7*, *CG33108*, *LSm3*, *KrT95D*, *Ime4*, *Miro*, *spas*, *Rox8*, *CG5986*, *Atg6*, *CG5991*, *CG6000*, *Hsp68*, *SMC1*, *4EHP*

***Df(3R)BSC42*, Breakpoints: 98B1-2;98B3-5**

*unc80*, *CG5590*, *CG12883*, *Sce*, *CG31055*, *CG12880*, *CG43319*, *Acp98AB*, *CG43320*, *ALiX*, *btz*, *CG12428*, *CG12877*, *Ets98B*, *CG34353*, *Or98P*, *Or98a*, *CG12426*, *mil*, *CG5003*
